# Supplementary material for: Impact of rs361072 in the Phosphoinositide 3-Kinase p110β Gene on Whole-Body Glucose Metabolism and Subunit Protein Expression in Skeletal Muscle
Source: PubMed Central journal article supplement — Diabetes. 2010 Jan 27;59(4):1108–12. doi: 10.2337/db09-1359 (PMC2844820; doi:10.2337/db09-1359), 2010-01-27
Supplement: supp_db09-1359_DB09-1359_Online_appendix.pdf [file supp_db09-1359_DB09-1359_Online_appendix.pdf]

## SUPPLEMENTARY RESEARCH DESIGN AND METHODS

**Muscle protein expression.** Approximately 50 mg of biopsy specimen was used for muscle homogenate and lysate preparation. The tissue was pulverized and homogenized by means of a homogenizer (Polytron PT 3100, Kinematica, Swiss) in a buffer (1:20, weight:vol) containing 50 mM HEPES (pH 7.5), 150 mM NaCl, 20 mM Na-pyrophosphate, 20 mM  $\beta$ -glycerophosphate, 10 mM NaF, 2 mM Na-ortovanadate, 2 mM EDTA, 1% Nonidet P-40, 10% glycerol, 2 mM PMSF, 1 mM  $MgCl_2$ , 1 mM  $CaCl_2$ , 10  $\mu$ g/ml leupeptin, 10  $\mu$ g/ml aprotinin, and 3 mM Benzamidine. All chemicals were obtained from Sigma-Aldrich, MO, USA. Homogenates were rotated end over end for 1 hour at 4 °C and then cleared by centrifugation for 1 hour at 17,500 g at 4 °C. The supernatant (lysate) was harvested and divided into several aliquots, frozen in liquid nitrogen and stored at -80 °C for later analysis. The protein content was measured using the bicinchoninic acid assay as recommended by the manufacturer (Pierce, Rockford, IL). p85 $\alpha$  and p110 $\beta$  contents were determined by SDS-PAGE and Western blotting using a Criterion Gel System (BioRad, Hercules, CA). The proteins were separated using 26 wells 7.5% Bis-Tris gels (BioRad), and transferred to Immobilon Transfer Membranes (Millipore, Billerica, MA). The membranes were incubated in primary and secondary antibodies as recommended by the manufacturers. p85 $\alpha$ : Anti-p85 $\alpha$ , 06-497 (Upstate Biotechnology Inc., MA), HRP-linked anti-rabbit, P0448 (DAKO, Glostrup, Denmark). p110 $\beta$ : Anti-p110 $\beta$ , Y384 (Abcam, Cambridge, UK), HRP-linked anti-rabbit, 7074 (Cell Signaling, Danvers, MA). Protein quantities of p85 $\alpha$  and p110 $\beta$  were expressed in arbitrary units relative to a human skeletal muscle standard. Analysis of assay linearity between signal and amount of protein loaded was verified for each of the antibodies used.

## SUPPLEMENTARY TABLES

**Supplementary table 1.** Characteristics of twin subjects stratified according to *PIK3RI* rs3730089 genotypes.

| <i>PIK3RI</i> rs3730089                                                             | GG                                     | GA                                     | AA                           | $P_{add}$ |
|-------------------------------------------------------------------------------------|----------------------------------------|----------------------------------------|------------------------------|-----------|
| Genotype frequency                                                                  | 75.3%                                  | 24.2%                                  | 0.5%                         | .         |
| <i>n</i> (male/female)                                                              | 146 (70/76)                            | 47 (26/21)                             | 1 (1/1)                      | .         |
| Age (years)                                                                         | 42.9 $\pm$ 17.0                        | 42.7 $\pm$ 17.0                        | 63                           | .         |
| BMI (kg/m <sup>2</sup> )                                                            | 25.1 $\pm$ 3.9                         | 24.6 $\pm$ 3.9                         | 29.0                         | 0.4       |
| Fat %                                                                               | 25.3 $\pm$ 8.7                         | 22.6 $\pm$ 8.4                         | 24.8                         | 0.2       |
| Fasting insulin (pmol/l)                                                            | 34.9 $\pm$ 17.6                        | 35.4 $\pm$ 22.6                        | 26.0                         | 0.9       |
| 30 min insulin (pmol/l)                                                             | 325.4 $\pm$ 177.3                      | 329.4 $\pm$ 177.2                      | 269.0                        | 0.3       |
| 120 min insulin (pmol/l)                                                            | 179.6 $\pm$ 137.1                      | 164.5 $\pm$ 132.6                      | 194.0                        | 0.6       |
| Fasting glucose (mmol/l)                                                            | 5.4 $\pm$ 0.5                          | 5.3 $\pm$ 0.9                          | 5.2                          | 0.1       |
| 30 min glucose (mmol/l)                                                             | 8.5 $\pm$ 1.7                          | 8.6 $\pm$ 1.8                          | 9.2                          | 0.4       |
| 120 min glucose (mmol/l)                                                            | 6.4 $\pm$ 1.5                          | 6.8 $\pm$ 2.1                          | 7.1                          | 0.07      |
| $R_d$ clamp (mg $\cdot$ kg <sub>FFM</sub> <sup>-1</sup> $\cdot$ min <sup>-1</sup> ) | 10.9 $\pm$ 3.5                         | 10.9 $\pm$ 3.2                         | 6.1                          | 0.4       |
| HGP clamp (mg $\cdot$ kg <sub>FFM</sub> <sup>-1</sup> $\cdot$ min <sup>-1</sup> )   | 1.6 $\pm$ 0.5                          | 1.4 $\pm$ 0.7                          | 1.6                          | 0.2       |
| HGP basal (mg $\cdot$ kg <sub>FFM</sub> <sup>-1</sup> $\cdot$ min <sup>-1</sup> )   | 3.1 $\pm$ 0.5                          | 3.0 $\pm$ 0.4                          | 2.9                          | 0.2       |
| Hepatic IR index                                                                    | 108.5 $\pm$ 56.1                       | 103.7 $\pm$ 65.1                       | 74.1                         | 0.8       |
| $D_i$                                                                               | 1.8 $\pm$ 1.2 $\cdot$ 10 <sup>-7</sup> | 1.8 $\pm$ 1.0 $\cdot$ 10 <sup>-7</sup> | 0.3 $\cdot$ 10 <sup>-7</sup> | 0.9       |

Association of *PIK3RI* rs3730089 with quantitative traits is shown in 194 Danish twins. Data are presented as mean $\pm$ SD. All  $P_{add}$  values are adjusted for sex, age, and twin pair and zygosity status.  $P_{add}$  values for plasma levels of glucose and insulin, and for metabolic rates and indices are additionally adjusted for body fat percentage.  $D_i$ : Disposition index, FFM: Fat-free body mass, HGP: Hepatic glucose production, IR: insulin resistance,  $R_d$ : Glucose disposal rate.

**Supplementary table 2.** Characteristics of Inter99 subjects stratified according to *PIK3RI* rs3730089 genotypes.

| <i>PIK3RI</i> rs3730089  | GG               | GA             | AA             | <i>P</i> <sub>add</sub> |
|--------------------------|------------------|----------------|----------------|-------------------------|
| Genotype frequency       | 70.1%            | 27.3%          | 2.6%           | .                       |
| <i>n</i> (male/female)   | 4039 (2017/2022) | 1572 (764/808) | 152 (83/69)    | .                       |
| Age (years)              | 46.1±7.9         | 46.2±7.9       | 46.5±7.6       | .                       |
| BMI (kg/m <sup>2</sup> ) | 26.3±4.6         | 26.1±4.5       | 26.1±4.2       | 0.1                     |
| Fasting insulin (pmol/l) | 42.5±28.3        | 40.4±25.8      | 41.7±34.4      | 0.046                   |
| 30 min insulin (pmol/l)  | 294.0±189.5      | 282.1±168.4    | 290.0±187.5    | 0.2                     |
| 120 min insulin (pmol/l) | 218.6±212.1      | 211.5±205.9    | 234.4±267.1    | 0.9                     |
| Fasting glucose (mmol/l) | 5.5±0.8          | 5.5±0.9        | 5.6±0.8        | 0.8                     |
| 30 min glucose (mmol/l)  | 8.7±1.9          | 8.6±1.9        | 8.7±1.9        | 0.3                     |
| 120 min glucose (mmol/l) | 6.2±2.1          | 6.2±2.2        | 6.3±2.4        | 0.2                     |
| HOMA-IR                  | 10.7±8.1         | 10.2±7.6       | 10.7±10.6      | 0.04                    |
| BIGTT-SI                 | 9.1±4.1          | 9.4±4.1        | 9.3±4.4        | 0.04                    |
| BIGTT-AIR                | 1852.7±1124.6    | 1822.9±962.6   | 1865.3±1247.6  | 0.7                     |
| D <sub>i</sub>           | 15236.5±7195.3   | 15743.6±7338.4 | 15081.0±6992.5 | 0.1                     |

Association of *PIK3RI* rs3730089 with quantitative traits in 5,763 Danish subjects. Data are presented as mean±SD. All *P*<sub>add</sub> values are adjusted for sex and age. *P*<sub>add</sub> values for plasma levels of glucose and insulin, HOMA-IR, BIGTT-SI, and BIGTT-AIR are additionally adjusted for BMI. D<sub>i</sub>: Disposition index, HOMA-IR: Homeostasis model assessment for insulin resistance, BIGTT-SI: Insulin sensitivity index, BIGTT-AIR: Acute insulin response index.

**Supplementary table 3.** p85α and p110β muscle proteins in twins stratified according to *PIK3RI* rs3730089 genotypes.

| <i>PIK3RI</i> rs3730089 | GG          | GA          | AA    | <i>P</i> <sub>add</sub> |
|-------------------------|-------------|-------------|-------|-------------------------|
| Basal p85α (AU)         | 717.0±238.8 | 690.8±145.2 | 953.5 | 0.4                     |
| Basal p110β (AU)        | 485.5±18.5  | 468.2±139.7 | 435.8 | 0.3                     |
| Basal p85α:p110β (AU)   | 1.62±0.76   | 1.55±0.37   | 2.19  | 0.6                     |
| Insulin p85α (AU)       | 708.5±236.2 | 733.0±145.2 | 786.7 | 0.7                     |
| Insulin p110β (AU)      | 499.7±187.2 | 501.1±196.7 | 357.7 | 0.6                     |
| Insulin p85α:p110β (AU) | 1.60±0.78   | 1.64±0.73   | 2.20  | 0.2                     |

Skeletal muscle protein quantities are shown in arbitrary units (AU) for 184 Danish twins. Data are presented as mean±SD. *P*<sub>add</sub> values are adjusted for sex, age, body fat percentage, and twin pair and zygosity status.
